# Supplementary material for: Microenvironmental Factors in Oral Cavity Squamous Cell Carcinoma Undergoing Surgery: Correlation with Diffusion Kurtosis Imaging and Dynamic Contrast-Enhanced MRI
Source: MDPI journal article supplement (doi:10.3390/cancers15010015), 2022-12-20
Supplement: s1 [file s1]

## Content:

### Tables

- ✓ **Supplementary Table S1:** Results of Shapiro-Wilk Normality Test from DCE-MRI Parameters
- ✓ **Supplementary Table S2:** Results of Shapiro-Wilk Normality Test from DKI-derived Parameters
- ✓ **Supplementary Table S3:** Results of Shapiro-Wilk Normality Test from numerical pathological parameters
- ✓ **Supplementary Table S4:**  $p$ -values derived from Kruskal-Wallis Test to assess the effect of the pathological factors on DCE-MRI and DKI parameters

**Supplementary Table S1: Results of Shapiro-Wilk Normality Test of DCE-MRI Parameters**

| Shapiro-Wilk Test                            | Test Statistic | p-value | Normality |
|----------------------------------------------|----------------|---------|-----------|
| Median of $K^{\text{trans}}$                 | 0,802          | 0,000   | 0         |
| IQR of $K^{\text{trans}}$                    | 0,858          | 0,000   | 0         |
| P10 of $K^{\text{trans}}$                    | 0,825          | 0,000   | 0         |
| P25 of $K^{\text{trans}}$                    | 0,804          | 0,000   | 0         |
| P75 of $K^{\text{trans}}$                    | 0,899          | 0,002   | 0         |
| P90 of $K^{\text{trans}}$                    | 0,910          | 0,004   | 0         |
| Skewness of $K^{\text{trans}}$               | 0,925          | 0,013   | 0         |
| Kurtosis of $K^{\text{trans}}$               | 0,665          | 0,000   | 0         |
| Mean of $K^{\text{trans}}$                   | 0,913          | 0,005   | 0         |
| <b>Std of <math>K^{\text{trans}}</math></b>  | 0,954          | 0,114   | <b>1</b>  |
| Energy of $K^{\text{trans}}$                 | 0,865          | 0,000   | 0         |
| Entropy of $K^{\text{trans}}$                | 0,929          | 0,017   | 0         |
| Median of $K_{\text{ep}}$                    | 0,879          | 0,001   | 0         |
| IQR of $K_{\text{ep}}$                       | 0,898          | 0,002   | 0         |
| P10 of $K_{\text{ep}}$                       | 0,867          | 0,000   | 0         |
| P25 of $K_{\text{ep}}$                       | 0,874          | 0,000   | 0         |
| P75 of $K_{\text{ep}}$                       | 0,927          | 0,015   | 0         |
| P90 of $K_{\text{ep}}$                       | 0,864          | 0,000   | 0         |
| Skewness of $K_{\text{ep}}$                  | 0,896          | 0,002   | 0         |
| Kurtosis of $K_{\text{ep}}$                  | 0,689          | 0,000   | 0         |
| Mean of $K_{\text{ep}}$                      | 0,790          | 0,000   | 0         |
| Std of $K_{\text{ep}}$                       | 0,780          | 0,000   | 0         |
| Energy of $K_{\text{ep}}$                    | 0,928          | 0,016   | 0         |
| <b>Entropy of <math>K_{\text{ep}}</math></b> | 0,985          | 0,874   | <b>1</b>  |
| Median of $v_e$                              | 0,935          | 0,026   | 0         |
| <b>IQR of <math>v_e</math></b>               | 0,968          | 0,327   | <b>1</b>  |
| <b>P10 of <math>v_e</math></b>               | 0,948          | 0,069   | <b>1</b>  |
| P25 of $v_e$                                 | 0,901          | 0,002   | 0         |
| P75 of $v_e$                                 | 0,850          | 0,000   | 0         |
| P90 of $v_e$                                 | 0,552          | 0,000   | 0         |
| Skewness of $v_e$                            | 0,932          | 0,021   | 0         |
| Kurtosis of $v_e$                            | 0,607          | 0,000   | 0         |
| <b>Mean of <math>v_e</math></b>              | 0,964          | 0,244   | <b>1</b>  |
| <b>Std of <math>v_e</math></b>               | 0,969          | 0,340   | <b>1</b>  |
| Energy of $v_e$                              | 0,601          | 0,000   | 0         |
| Entropy of $v_e$                             | 0,763          | 0,000   | 0         |

Abbreviations: Std, standard deviation; IQR, Inter-quartile range. Variables normally distributed are in **bold**.

**Supplementary Table S2: Results of Shapiro-Wilk Normality Test of DKI-derived Parameters**

| Shapiro-Wilk Test    | Test Statistic | p-value | Normality |
|----------------------|----------------|---------|-----------|
| Median of D          | 0,932          | 0,026   | 0         |
| IQR of D             | 0,933          | 0,028   | 0         |
| <b>P10 of D</b>      | 0,944          | 0,063   | <b>1</b>  |
| P25 of D             | 0,900          | 0,003   | 0         |
| <b>P75 of D</b>      | 0,962          | 0,242   | <b>1</b>  |
| <b>P90 of D</b>      | 0,947          | 0,079   | <b>1</b>  |
| <b>Skewness of D</b> | 0,980          | 0,719   | <b>1</b>  |
| Kurtosis of D        | 0,893          | 0,002   | 0         |
| <b>Mean of D</b>     | 0,944          | 0,060   | <b>1</b>  |
| <b>Std of D</b>      | 0,943          | 0,057   | <b>1</b>  |
| Energy of D          | 0,791          | 0,000   | 0         |
| Entropy of D         | 0,891          | 0,002   | 0         |
| <b>Median of K</b>   | 0,988          | 0,953   | <b>1</b>  |
| <b>IQR of K</b>      | 0,963          | 0,246   | <b>1</b>  |
| P10 of K             | 0,898          | 0,003   | 0         |
| <b>P25 of K</b>      | 0,983          | 0,845   | <b>1</b>  |
| <b>P75 of K</b>      | 0,956          | 0,147   | <b>1</b>  |
| <b>P90 of K</b>      | 0,950          | 0,097   | <b>1</b>  |
| Skewness of K        | 0,874          | 0,001   | 0         |
| Kurtosis of K        | 0,606          | 0,000   | 0         |
| <b>Mean of K</b>     | 0,970          | 0,397   | <b>1</b>  |
| <b>Std of K</b>      | 0,966          | 0,317   | <b>1</b>  |
| Energy of K          | 0,860          | 0,000   | 0         |
| Entropy of K         | 0,933          | 0,029   | 0         |

Abbreviations: Std, standard deviation; IQR, Inter-quartile range. Variables normally distributed are in **bold**.

**Supplementary Table S3:** Results of Shapiro-Wilk Normality Test from numerical pathological parameters

| Shapiro-Wilk Test | Test Statistic | p-value | Normality |
|-------------------|----------------|---------|-----------|
| TSR               | 0,939          | 0,042   | 0         |
| TILs              | 0,841          | 0,000   | 0         |

Abbreviations:    TSR,    Tumor    stroma    ratio;    TIL,    tumor-infiltrating    lymphocytes.

**Supplementary Table S4:** *p*-values derived from the Wruskal-Wallis test to assess the effect of the pathological factors on DCE-MRI and DKI parameters (only statistically significant results are reported)

| Kurtosis of $K_{ep}$    |                         |  |  |  |  |  |  |  |  |  |  |  |  |
|-------------------------|-------------------------|--|--|--|--|--|--|--|--|--|--|--|--|
| Perineural infiltration | 0,044                   |  |  |  |  |  |  |  |  |  |  |  |  |
|                         | Skewness of K           |  |  |  |  |  |  |  |  |  |  |  |  |
| CD3/20 prominence       | 0,048                   |  |  |  |  |  |  |  |  |  |  |  |  |
|                         | Energy of $K_{trans}$   |  |  |  |  |  |  |  |  |  |  |  |  |
| CD4/8 prominence        | 0,019                   |  |  |  |  |  |  |  |  |  |  |  |  |
|                         | Energy of D             |  |  |  |  |  |  |  |  |  |  |  |  |
| Keratinization          | Entropy of D            |  |  |  |  |  |  |  |  |  |  |  |  |
|                         | 0,018 0,029             |  |  |  |  |  |  |  |  |  |  |  |  |
| Inflammatory infiltrate | Mean of D               |  |  |  |  |  |  |  |  |  |  |  |  |
|                         | Median of D             |  |  |  |  |  |  |  |  |  |  |  |  |
| Grading                 | P25 of D                |  |  |  |  |  |  |  |  |  |  |  |  |
|                         | P90 of D                |  |  |  |  |  |  |  |  |  |  |  |  |
| Desmoplastic reaction   | Mean of D               |  |  |  |  |  |  |  |  |  |  |  |  |
|                         | 0,042 0,033 0,047 0,013 |  |  |  |  |  |  |  |  |  |  |  |  |
| Inflammatory infiltrate | Energy of $K_{ep}$      |  |  |  |  |  |  |  |  |  |  |  |  |
|                         | Entropy of $K_{ep}$     |  |  |  |  |  |  |  |  |  |  |  |  |
| Grading                 | IQR of $K_{ep}$         |  |  |  |  |  |  |  |  |  |  |  |  |
|                         | P90 of $K_{ep}$         |  |  |  |  |  |  |  |  |  |  |  |  |
| Desmoplastic reaction   | P75 of $K_{ep}$         |  |  |  |  |  |  |  |  |  |  |  |  |
|                         | P90 of $K_{ep}$         |  |  |  |  |  |  |  |  |  |  |  |  |
| Inflammatory infiltrate | IQR of $v_e$            |  |  |  |  |  |  |  |  |  |  |  |  |
|                         | Std of $v_e$            |  |  |  |  |  |  |  |  |  |  |  |  |
| Grading                 | 0,027 0,005             |  |  |  |  |  |  |  |  |  |  |  |  |
|                         | Mean of $K_{ep}$        |  |  |  |  |  |  |  |  |  |  |  |  |
| Desmoplastic reaction   | P90 of $K_{ep}$         |  |  |  |  |  |  |  |  |  |  |  |  |
|                         | P75 of $K_{ep}$         |  |  |  |  |  |  |  |  |  |  |  |  |
| Inflammatory infiltrate | P25 of $K_{ep}$         |  |  |  |  |  |  |  |  |  |  |  |  |
|                         | P10 of $K_{ep}$         |  |  |  |  |  |  |  |  |  |  |  |  |
| Grading                 | Median of $K_{ep}$      |  |  |  |  |  |  |  |  |  |  |  |  |
|                         | P25 of $K_{trans}$      |  |  |  |  |  |  |  |  |  |  |  |  |
| Desmoplastic reaction   | P10 of $v_e$            |  |  |  |  |  |  |  |  |  |  |  |  |
|                         | P25 of $v_e$            |  |  |  |  |  |  |  |  |  |  |  |  |
| Inflammatory infiltrate | Std of $v_e$            |  |  |  |  |  |  |  |  |  |  |  |  |
|                         | Skewness of K           |  |  |  |  |  |  |  |  |  |  |  |  |
| Grading                 | Kurtosis of K           |  |  |  |  |  |  |  |  |  |  |  |  |
|                         | 0,015 0,010             |  |  |  |  |  |  |  |  |  |  |  |  |
